Title: KidneyChain: Leveraging Blockchain & Artificial Intelligence for a Streamlined Organ Donation Solution

Authors: Kapil Panda, Anirudh Mazumder, Akhil Krishnamurthy

Withdrawal Statement: The authors have withdrawn their manuscript owing to issues with data. Therefore, the authors do not wish this work to be cited as reference for the project. If you have any questions, please contact the corresponding author.
